# Supplementary material
Source: publisher site journal article supplement (https://www.spandidos-publications.com/4231/downloadSupplementary)
Supplement: Supplementary file 1 [file downloadSupplementary]

## Sheet: Sizes-CNA
Table SV. Number of CNA by length (Kb).
Samples	Tissue	Type	Kb						Total
			1-50	50 - 100	100 - 200	200 - 500	500 - 1000	>1000
AII patients by tissue-type	DGC	Loss	0	0	633	432	87	43	1195
	DGC	Gain	0	0	893	859	340	218	2310
	IGC	Loss	0	0	782	350	65	34	1231
	IGC	Gain	0	0	797	538	156	59	1550
	NAG	Loss	419	15	14	4	0	1	453
	NAG	Gain	344	11	11	5	4	1	376
≥ 3 patients	DGC	Loss	0	0	130	50	2	12	194
	DGC	Gain	0	0	306	183	25	2	516
	IGC	Loss	0	0	196	63	5	12	276
	IGC	Gain	0	0	214	88	10	2	314
	NAG	Loss	130	3	2	1	0	0	136
	NAG	Gain	190	1	2	0	0	0	193
